# Supplementary material
Source: PubMed Central journal article supplement (PMC4789915)
Supplement: gara000514.ww1_default.pdf [file gara000514.ww1_default.pdf]

**Appendix:** Definition of death, cardiovascular events using valid diagnostic and procedural codes in Ontario healthcare databases [posted as supplied by author]

| Condition                                                           | Database        | Codes                                                      | Validity <sup>a,b</sup>                                                              |
|---------------------------------------------------------------------|-----------------|------------------------------------------------------------|--------------------------------------------------------------------------------------|
| Death                                                               | RPDB, CIHI      | Vital status field                                         | Sensitivity: 94% <sup>1</sup><br>Positive predictive value: 100% <sup>1</sup>        |
| Acute myocardial infarction                                         | CIHI–diagnostic | ICD-9 410x                                                 | Sensitivity: 89% <sup>2</sup><br>Positive predictive value: 89% <sup>2</sup>         |
|                                                                     | CIHI–diagnostic | ICD-10-CA I21                                              | Sensitivity: 89% <sup>3</sup><br>Positive predictive value: 87% <sup>3</sup>         |
| Stroke, non-subarachnoid haemorrhagic or infarction                 | CIHI–diagnostic | ICD-9 431, 432.9, 434x, 436                                | Positive predictive value: 79–88% <sup>4</sup>                                       |
|                                                                     | CIHI–diagnostic | ICD-10-CA I61, I62, I63, I64                               | Sensitivity: 75–81% <sup>3</sup><br>Positive predictive value: 69–87% <sup>3</sup>   |
| Coronary artery angioplasty or coronary artery bypass graft surgery | CIHI–procedure  | CCI 1IJ50, 1IJ76                                           | Sensitivity: 99–100% <sup>3</sup><br>Positive predictive value: 97–100% <sup>3</sup> |
|                                                                     | CIHI–procedure  | CCP 48.02, 48.03, 48.09, 48.11–48.19                       | Sensitivity: 99% <sup>5,6</sup><br>Positive predictive value: 100% <sup>5,6</sup>    |
|                                                                     | OHIP–procedure  | OHIP Z434, R742, R743 <sup>c</sup>                         |                                                                                      |
| Carotid endarterectomy                                              | OHIP–procedure  | OHIP N220, R792 <sup>c</sup>                               |                                                                                      |
| Abdominal aortic aneurysm repair and aortic bypass                  | CIHI–procedure  | CCI 1KA76                                                  | Sensitivity: 79% <sup>3</sup><br>Positive predictive value: 75% <sup>3</sup>         |
|                                                                     | CIHI–procedure  | CCP 50.24, 50.34                                           |                                                                                      |
|                                                                     | OHIP–procedure  | OHIP R802, R816, R817, R783, R784, R785, R814 <sup>c</sup> |                                                                                      |
| Peripheral vascular bypass surgery                                  | CIHI–procedure  | CCI 1KG76                                                  | Sensitivity: 87% <sup>3</sup><br>Sensitivity: 87% <sup>3</sup> 88% <sup>3</sup>      |
|                                                                     | CIHI–procedure  | CCP 51.25                                                  |                                                                                      |
|                                                                     | OHIP–procedure  | OHIP R787, R780, R797, R804 <sup>c</sup>                   |                                                                                      |

<sup>a</sup> Information regarding specificity and negative predictive value is omitted. In almost all instances these parameters were high and precise because of the low underlying prevalence of the diagnoses or procedures in the dataset.

<sup>b</sup> Validation performed against the following reference standards: chart review <sup>1</sup>, patient registry <sup>2</sup>, chart abstraction and recoding <sup>3-6</sup>. Diagnostic conditions were considered present in the discharge abstract for any hospitalization if it was listed as the primary reason for the majority of length of hospital stay.

<sup>c</sup> Approximately 95% of Ontario physicians operate under the fee for service payment structure of the Ontario Health Insurance Plan. The sensitivity and positive predictive value of these procedure codes is expected to be high <sup>7</sup>, as shown with other service payments <sup>8</sup>. Other studies have reported the value of using physician billing data in combination with other administrative health care data to improve the identification of relevant procedures <sup>9</sup>.

CCI, Canadian Classification of Health Interventions; CCP, Canadian Classification of Diagnostic, Therapeutic and Surgical Procedures; CIHI, Canadian Institute for Health Information hospital discharge abstract database; ICD-9-CM, International Classification of Disease, Ninth Revision, Clinical Modification; ICD-10, International Classification of Disease, Tenth Revision; ICD-10-CA, International Classification of Disease, Tenth Revision, Canadian Enhancement; OHIP, Ontario Health Insurance Plan database; RPDB, Registered Persons Database of Ontario.

1. Jha P, Deboer D, Sykora K, Naylor CD. Characteristics and mortality outcomes of thrombolysis trial participants and nonparticipants: a population-based comparison. *J Am Coll Cardiol* 1996;27:1335-42.
2. Austin PC, Daly PA, Tu JV. A multicenter study of the coding accuracy of hospital discharge administrative data for patients admitted to cardiac care units in Ontario. *Am Heart J* 2002;144:290-6.
3. Juurlink DN, Preyra C, Croxford R, Chong A, Austin P, Tu JV, et al. Canadian Information Discharge Abstract Database: a validation study. Institute for Clinical Evaluative Sciences 2006.
4. Liu L, Reeder B, Shuaib A, Mazagri R. Validity of stroke diagnosis on hospital discharge records in Saskatchewan, Canada: implications for stroke surveillance. *Cerebrovasc Dis* 1999;9:224-30.
5. Richards J, Brown A, Homan C. The data quality study of the Canadian discharge abstract database. Proceedings of Statistics Canada Symposium 2011, Achieving Data Quality in a Statistical Agency. 2001.
6. Canadian Institute for Health Information. Discharge abstract database data quality re-abstraction study: combined findings for 1999/2000 and 2000/2001. Canadian Institute for Health Information, 2002.
7. Williams J, Young W. A summary of studies on the quality of health care administrative databases in Canada. In: Goel V, Williams JI, Anderson GM, et al, eds. Patterns of health care in Ontario. ICES Practice Atlas. Canadian Medical Association, 1996.
8. Raina P, Torrance-Rynard V, Wong M, Woodward C. Agreement between self-reported and routinely collected health-care utilization data among seniors. *Health Serv Res* 2002;37:751-74.
9. Potter BK, Manuel D, Speechley KN, Gutmanis IA, Campbell MK, Koval JJ. Is there value in using physician billing claims along with other administrative health care data to document the burden of adolescent injury? An exploratory investigation with comparison to self-reports in Ontario, Canada. *BMC Health Serv Res* 2005;5:15.
